# Supplementary material
Source: ML conference proceedings conference paper supplement (https://openaccess.thecvf.com/content/ICCV2021/html/Lu_Simpler_Is_Better_ICCV_2021_paper.html)
Supplement: Supplementary file 1 [file Lu_Simpler_Is_Better_ICCV_2021_supplemental.pdf]

# Supplementary: Simpler is Better: Few-shot Semantic Segmentation with Classifier Weight Transformer

## 1. Results with VGG-16 Backbone

Some previous methods conducted experiments with VGG-16 backbone. For a comprehensive comparison, we also report the results with VGG-16 on both datasets, COCO-20<sup>i</sup> and PASCAL-5<sup>i</sup>. The results show that we gain the same observation as that with other two backbones, ResNet-50 and ResNet-101. Concretely, the proposed CWT yields a new state-of-the-art performance on COCO-20<sup>i</sup> (see Table 1) for both 1-shot and 5-shot settings by a large margin. For PASCAL-5<sup>i</sup> results in Table 2, our method surpasses others for 5-shot case whilst it is comparable to the state-of-the-art for 1-shot case.

| Backbone | Methods          | 1-shot      |             |             |             |             | 5-shot      |             |             |             |             |
|----------|------------------|-------------|-------------|-------------|-------------|-------------|-------------|-------------|-------------|-------------|-------------|
|          |                  | s-0         | s-1         | s-2         | s-3         | Mean        | s-0         | s-1         | s-2         | s-3         | Mean        |
| VGG-16   | PANet [5]        | -           | -           | -           | -           | 20.9        | -           | -           | -           | -           | 29.7        |
|          | FWB [1] (ICCV19) | 18.4        | 16.7        | 19.6        | 25.4        | 20.0        | 20.9        | 19.2        | 21.9        | 28.4        | 22.6        |
|          | CWT (Ours)       | <b>28.0</b> | <b>32.0</b> | <b>31.4</b> | <b>28.0</b> | <b>29.9</b> | <b>35.1</b> | <b>39.5</b> | <b>34.5</b> | <b>36.2</b> | <b>36.3</b> |

Table 1. Few-shot semantic segmentation results on COCO-20<sup>i</sup> with VGG-16 backbone.

| Backbone | Methods              | 1-shot      |             |             |             |             | 5-shot      |             |             |             |             |
|----------|----------------------|-------------|-------------|-------------|-------------|-------------|-------------|-------------|-------------|-------------|-------------|
|          |                      | s-0         | s-1         | s-2         | s-3         | Mean        | s-0         | s-1         | s-2         | s-3         | Mean        |
| VGG-16   | OSLSM [3] (BMVC17)   | 33.6        | 55.3        | 40.9        | 33.5        | 40.8        | 35.9        | 58.1        | 42.7        | 39.1        | 44.0        |
|          | co-FCN [2] (ICLRW18) | 36.7        | 50.6        | 44.9        | 32.4        | 41.1        | 37.5        | 50.0        | 44.1        | 33.9        | 41.4        |
|          | AMP [4] (ICCV19)     | 41.9        | 50.2        | 46.7        | 34.7        | 43.4        | 41.8        | 55.5        | 50.3        | 39.9        | 46.9        |
|          | PANet [5] (ICCV19)   | 42.3        | 58.0        | 51.1        | 41.2        | 48.1        | 51.8        | 64.6        | 59.8        | 46.5        | 55.7        |
|          | FWB [1] (ICCV19)     | 47.0        | 59.6        | 52.5        | 48.3        | 51.9        | 50.9        | 62.9        | 56.5        | 50.1        | 55.1        |
|          | SG-One [7] (TCYB20)  | 40.2        | 58.4        | 48.4        | 38.4        | 46.3        | 41.9        | 58.6        | 48.6        | 39.4        | 47.1        |
|          | RPMs [6] (ECCV20)    | 47.1        | <b>65.8</b> | 50.6        | <b>48.5</b> | <b>53.0</b> | 50.0        | <b>66.5</b> | 51.9        | 47.6        | 54.0        |
|          | CWT (Ours)           | <b>48.9</b> | 59.8        | <b>56.7</b> | 42.8        | 52.1        | <b>53.0</b> | 64.5        | <b>64.1</b> | <b>48.8</b> | <b>57.6</b> |

Table 2. Few-shot semantic segmentation results on PASCAL-5<sup>i</sup> with VGG-16 backbone

## References

- [1] Khoi Nguyen and Sinisa Todorovic. Feature weighting and boosting for few-shot segmentation. In *ICCV*, 2019. 1
- [2] Kate Rakelly, Evan Shelhamer, Trevor Darrell, Alyosha Efros, and Sergey Levine. Conditional networks for few-shot semantic segmentation. In *ICLRW*, 2018. 1
- [3] Amirreza Shaban, Shray Bansal, Zhen Liu, Irfan Essa, and Byron Boots. One-shot learning for semantic segmentation. In *BMVC*, 2017. 1
- [4] Mennatullah Siam, Boris N Oreshkin, and Martin Jagersand. AMP: Adaptive masked proxies for few-shot segmentation. In *ICCV*, 2019. 1
- [5] Kaixin Wang, Jun Hao Liew, Yingting Zou, Daquan Zhou, and Jiashi Feng. PANet: Few-shot image semantic segmentation with prototype alignment. In *ICCV*, 2019. 1
- [6] Boyu Yang, Chang Liu, Bohao Li, Jianbin Jiao, and Qixiang Ye. Prototype mixture models for few-shot semantic segmentation. In *ECCV*, 2020. 1

- [7] Xiaolin Zhang, Yunchao Wei, Yi Yang, and Thomas S Huang. SG-One: Similarity guidance network for one-shot semantic segmentation. *IEEE Transactions on Cybernetics*, 2020. 1
